# Supplementary material for: Predicting Longitudinal Progression in Functional Mobility After Stroke: A Prospective Cohort Study
Source: PubMed Central journal article supplement (PMC7306259; doi:10.1161/strokeaha.120.029913), 2020-06-17
Supplement: str-51-2179-s001.pdf [file str-51-2179-s001.pdf]

# SUPPLEMENTAL MATERIAL

## Predicting Longitudinal Changes in Functional Mobility After Stroke: A Prospective Cohort Study

Cover title: Changes in functional mobility after stroke

Dongni Buvarp MD Ph.D,<sup>1</sup> Lena Rafsten, PT MSc,<sup>1,2</sup> Katharina S Sunnerhagen, MD Ph.D<sup>1,2</sup>

<sup>1</sup>Rehabilitation Research Group, Department of Clinical Neuroscience, Institute of Neuroscience and Physiology, Sahlgrenska Academy, University of Gothenburg and

<sup>2</sup>Sahlgrenska University Hospital, Gothenburg, Sweden

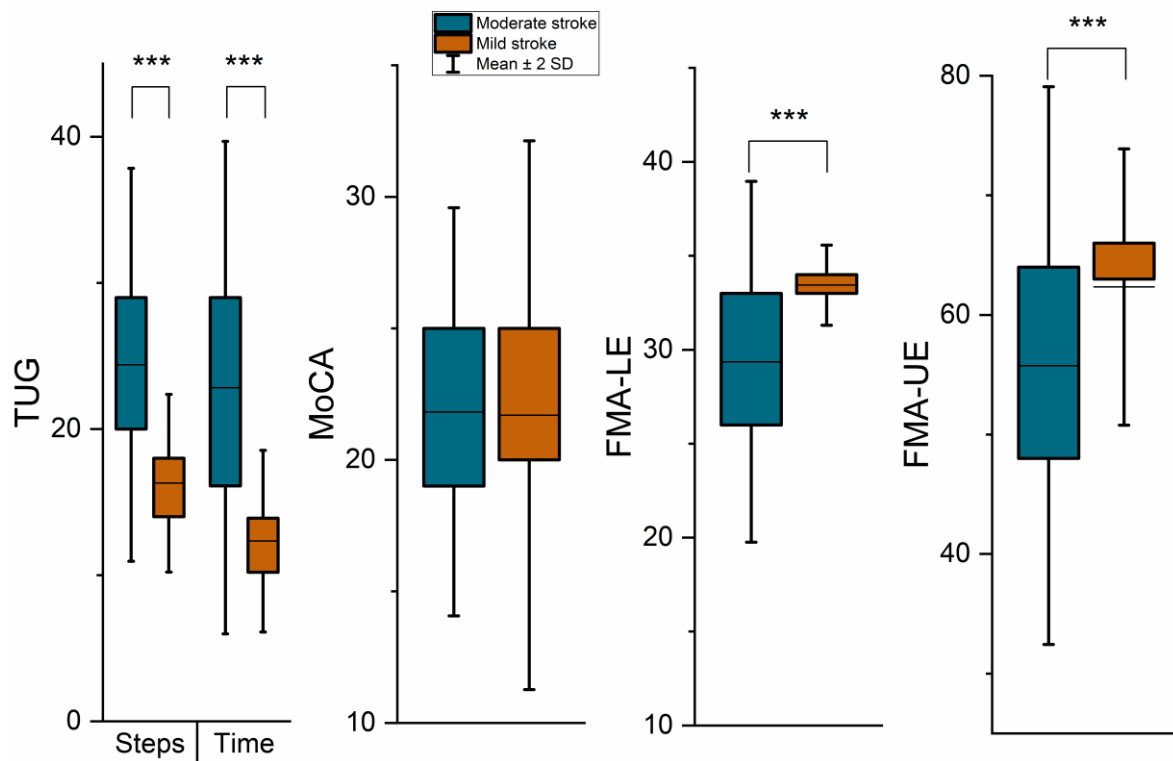

**Supplementary Figure I.** Distribution of impairments between clusters is shown. SD, standard deviation; TUG, Timed Up-and-Go test; MoCA, Montreal Cognitive Assessment; FMA, Fugl-Meyer Assessment; UE, upper extremity; LE, lower extremity.\*\*\*  $P < 0.001$

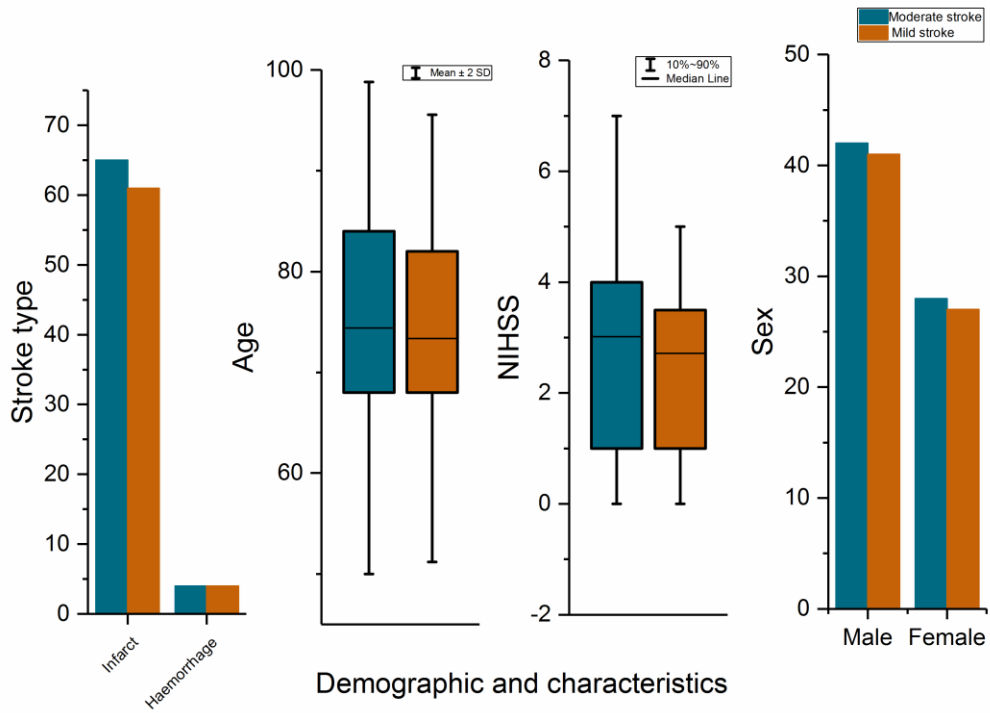

**Supplementary Figure II.** Distribution of demographic and characteristics between clusters is shown. NIHSS, National Institute of Health Stroke Scale;

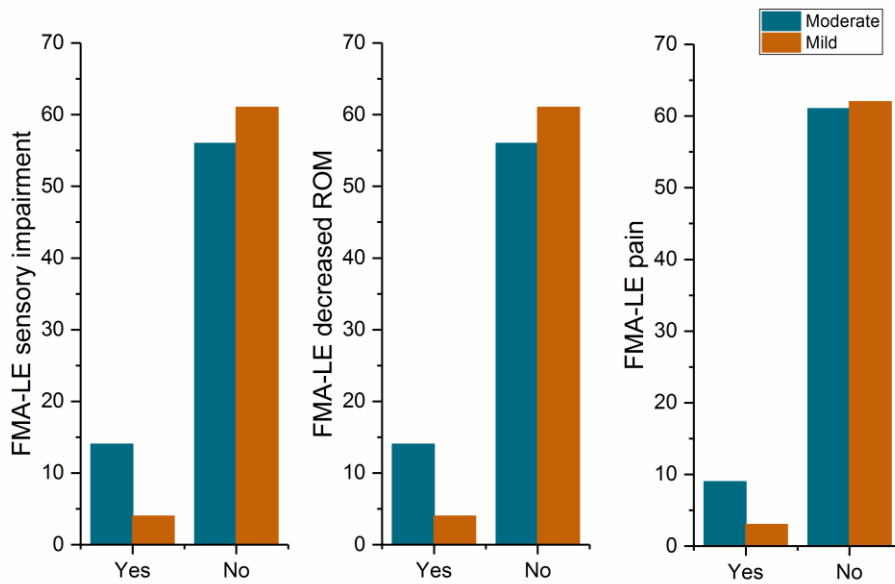

**Supplementary Figure III.** Distribution of impairments in lower-limb between clusters is shown. FMA, Fugl-Meyer Assessment; LE, lower extremity.

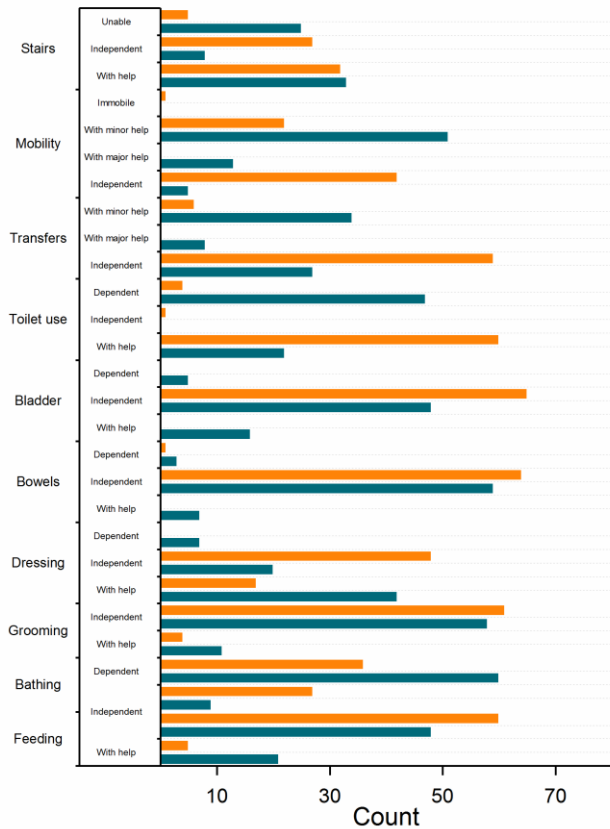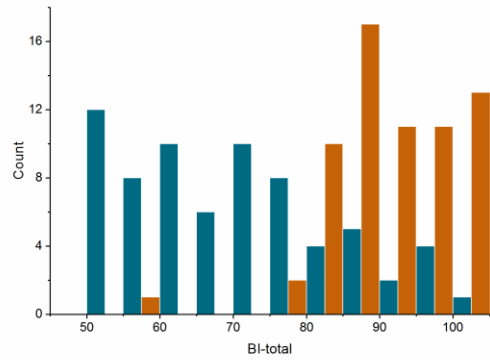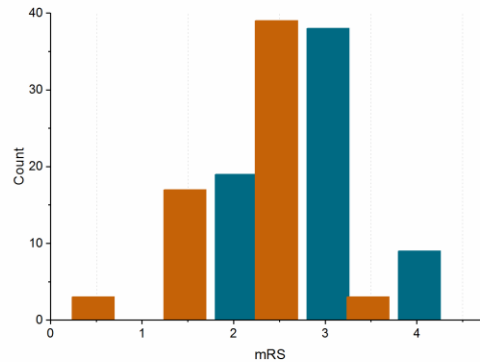

**Supplementary Figure IV.** Distribution of activity limitations between clusters is shown. BI, Barthel index; mRS, modified Rankin Scale;

### Statistics analysis

Baseline cluster analysis for processing mixed type data was conducted in R 3.6.1 (R Foundation for Statistical Computing, Vienna, Austria). Missing values was imputed using package ‘MissForest’ in R version 3.6.1 (R Foundation for Statistical Computing, Vienna, Austria). A random-coefficient model was developed using PROC MIXED in SAS version 9.4 (SAS Institute, Inc, Cary, NC).
